# Supplementary material
Source: Royal Society of Chemistry journal article supplement (doi:10.1039/d6gc01294a)
Supplement: d6gc01294a1.pdf [file d6gc01294a1.pdf]

Supporting Information

## **Multidimensional Engineering of *Komagataella phaffii* for Efficient Synthesis of Retinal**

Jingnan Wang<sup>a</sup>, Wenqi Ma<sup>a</sup>, Yuxuan Xin<sup>a</sup>, Jiayi Cui<sup>a</sup>, Feng Guo<sup>a</sup>, Yujia Jiang<sup>a</sup>,

Wankui Jiang<sup>a</sup>, Fengxue Xin<sup>a\*</sup>, Wenming Zhang<sup>a\*</sup>, Min Jiang<sup>a</sup>

<sup>a</sup> State Key Laboratory of Materials-Oriented Chemical Engineering,

College of Biotechnology and Pharmaceutical Engineering,

Nanjing Tech University, Nanjing, 211800, P.R. China

\*Corresponding authors at:

State Key Laboratory of Materials-Oriented Chemical Engineering, College of

Biotechnology and Pharmaceutical Engineering, Nanjing Tech University, Puzhu

South Road 30#, Nanjing 211800, P. R. China.

E-mail addresses: [zhangwm@njtech.edu.cn](mailto:zhangwm@njtech.edu.cn) (W.M. Zhang),

[xinfengxue@njtech.edu.cn](mailto:xinfengxue@njtech.edu.cn) (F. X. Xin)

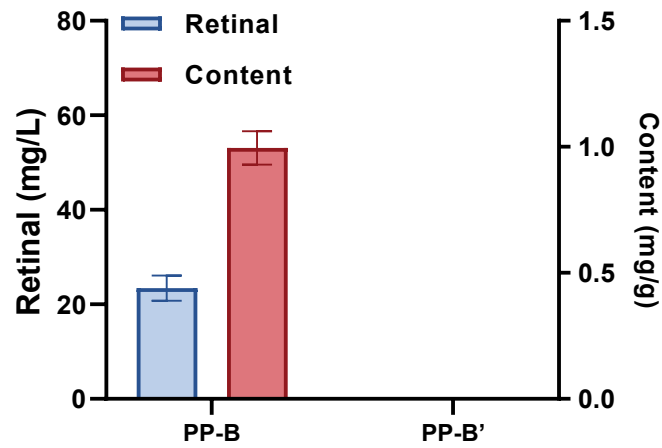

**Figure S1.** Production of retinal and content of engineered PP-B and PP-B'.

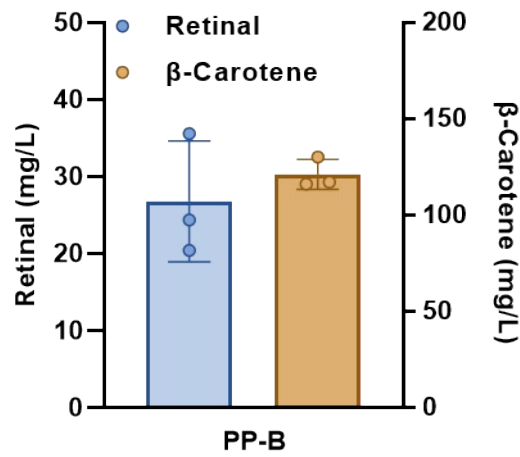

**Figure S2.** Production of retinal and  $\beta$ -carotene of engineered strain PP-B.

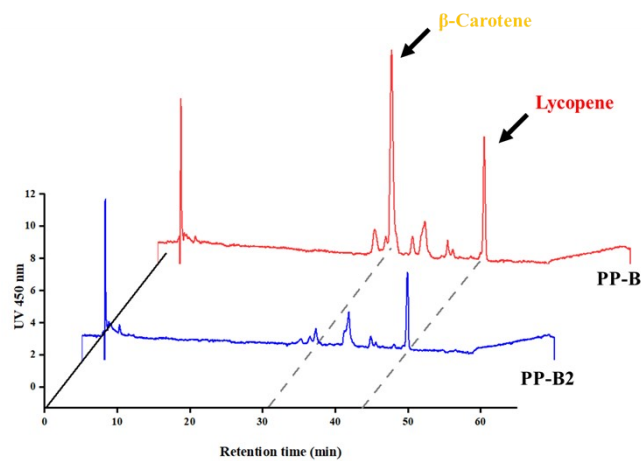

**Figure S3.** HPLC analysis of the carotenoid profile of PP-B and PP-B2.

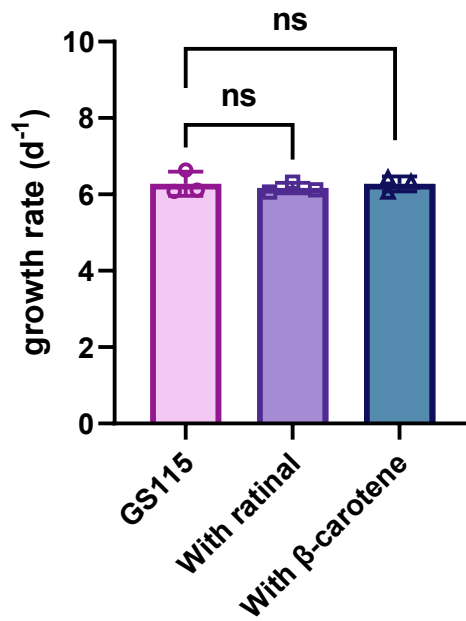

**Figure S4.** Effects of additional supplementation of  $\beta$ -carotene and retinal on the growth rate of *K. phaffii* GS115.

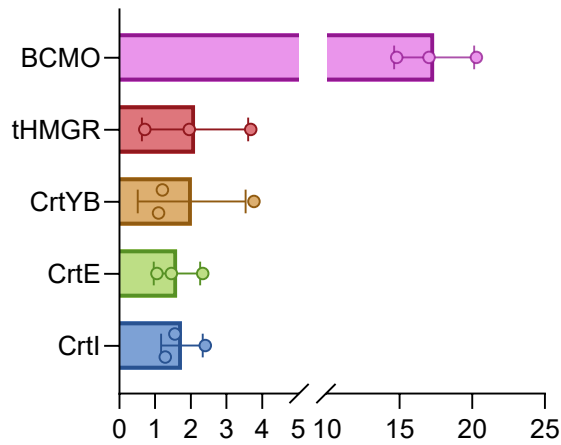

**Figure S5.** Key gene validation analysis of PP-B compared with PP-B2.

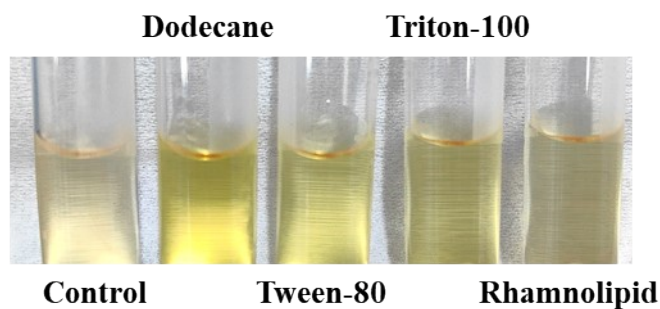

**Figure S6.** Color differences in the supernatant after addition of different surfactants.

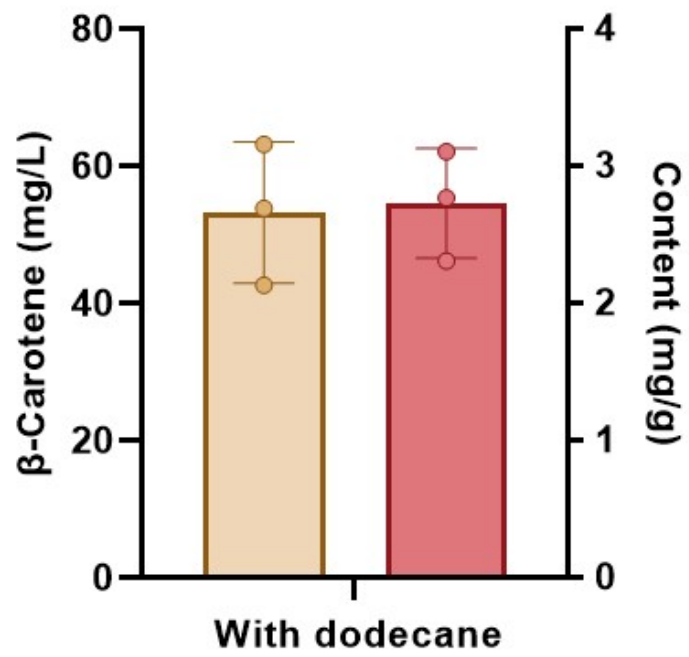

**Figure S7.** The production and content of  $\beta$ -carotene with adding dodecane.

**Table S1.** Primers Used in This Study.

| <b>Primers</b> | <b>Sequence</b>              |
|----------------|------------------------------|
| crtI-F         | GGTCTCCCATGACTGCTTTGGCCTA    |
| crtI-R         | GGTCTCGAAGCTTACTGACCCTCCCAAC |
| crtE-F         | GGTCTCCCATGGGCAAAGAGAAGGA    |
| crtE-R         | GGTCTCAAAGCGAATTCTTAGAAGG    |
| crtYB-F        | GGTCTCCCATGGACTACGCCAACAT    |
| crtYB-R        | GGTCTCGAAGCTTACAGTGGGATGT    |
| tHMGR-F        | GGTCTCCCATGGACCAATTGGTGAA    |
| tHMGR-R        | GGTCTCGAAGCTTAGGATTTAATGC    |
| BLH-F          | GGTCTCCCATGGGACTCATGCTAAT    |
| BLH-R          | GGTCTCGAAGCTCAATTTTAAATCTTA  |

**Table S2.** Plasmids Used in This Study.

| <b>Plasmid</b> | <b>Description</b>                                                                 | <b>Source</b> |
|----------------|------------------------------------------------------------------------------------|---------------|
| BB1-23         | Integrative vector with the Kan <sup>R</sup> marker                                | Purchase      |
| BB1-23-crtI    | <i>crtI</i> , Kan <sup>R</sup>                                                     | This study    |
| BB1-23-crtE    | <i>crtE</i> , Kan <sup>R</sup>                                                     | This study    |
| BB1-23-crtYB   | <i>crtYB</i> , Kan <sup>R</sup>                                                    | This study    |
| BB1-23-tHMGR   | <i>tHMGR</i> , Kan <sup>R</sup>                                                    | This study    |
| BB1-23-BLH     | <i>blh</i> , Kan <sup>R</sup>                                                      | This study    |
| BB1-23-carRP   | <i>carRP</i> , Kan <sup>R</sup>                                                    | This study    |
| BB1-23-carB    | <i>carB</i> , Kan <sup>R</sup>                                                     | This study    |
| BB1-23-BCO1    | BCO1, Kan <sup>R</sup>                                                             | This study    |
| BB2-AB         | Integrative vector with the Amp <sup>R</sup> marker                                | Purchase      |
| BB2-BC         | Integrative vector with the Amp <sup>R</sup> marker                                | Purchase      |
| BB2-CD         | Integrative vector with the Amp <sup>R</sup> marker                                | Purchase      |
| BB2-DE         | Integrative vector with the Amp <sup>R</sup> marker                                | Purchase      |
| BB2-EF         | Integrative vector with the Amp <sup>R</sup> marker                                | Purchase      |
| BB2-AB-crtI    | P <sub>GPM1</sub> - <i>crtI</i> -T <sub>S<sub>c</sub>CYC1</sub> , Amp <sup>R</sup> | This study    |
| BB2-BC-crtE    | P <sub>PDC1</sub> - <i>crtE</i> -T <sub>RPP1B</sub> , Amp <sup>R</sup>             | This study    |
| BB2-CD-crtYB   | P <sub>MDH3</sub> - <i>crtYB</i> -T <sub>RPS2</sub> , Amp <sup>R</sup>             | This study    |
| BB2-DE-tHMGR   | P <sub>ADH2</sub> - <i>tHMGR</i> -T <sub>RPL2A</sub> , Amp <sup>R</sup>            | This study    |
| BB2-CD-tHMGR   | P <sub>ADH2</sub> - <i>tHMGR</i> -T <sub>RPL2A</sub> , Amp <sup>R</sup>            | This study    |
| BB2-EF-BLH     | P <sub>GAP</sub> - <i>blh</i> -T <sub>RPS25A</sub> , Amp <sup>R</sup>              | This study    |

---

|                             |                                                                                                                                                                                                                                      |            |
|-----------------------------|--------------------------------------------------------------------------------------------------------------------------------------------------------------------------------------------------------------------------------------|------------|
| BB2-EF-BCO1                 | $P_{GAP}$ -BCO1- $T_{RPS25A}$ , Amp <sup>R</sup>                                                                                                                                                                                     | This study |
| BB2-AB-carRP                | $P_{GPM1}$ - <i>carRP</i> - $T_{ScCYC1}$ , Amp <sup>R</sup>                                                                                                                                                                          | This study |
| BB2-BC-carB                 | $P_{PDC1}$ - <i>carB</i> - $T_{RPP1B}$ , Amp <sup>R</sup>                                                                                                                                                                            | This study |
| BB3-aK-AF                   | Integrative vector with the Kan <sup>R</sup> marker                                                                                                                                                                                  | Purchase   |
| BB3-aK-AD-<br>crtIEYB       | $P_{GPM1}$ - <i>crtI</i> - $T_{ScCYC1}$ , $P_{PDC1}$ - <i>crtE</i> - $T_{RPP1B}$ , $P_{MDH3}$ -<br><i>crtYB</i> - $T_{RPS2}$ , Kan <sup>R</sup>                                                                                      | This study |
| BB3-aK-AC-<br>carRP/B       | $P_{GPM1}$ - <i>carRP</i> - $T_{ScCYC1}$ , $P_{PDC1}$ - <i>carB</i> - $T_{RPP1B}$ , Kan <sup>R</sup>                                                                                                                                 | This study |
| BB3-aK-AE-<br>crtIEYBt      | $P_{GPM1}$ - <i>crtI</i> - $T_{ScCYC1}$ , $P_{PDC1}$ - <i>crtE</i> - $T_{RPP1B}$ , $P_{MDH3}$ -<br><i>crtYB</i> - $T_{RPS2}$ , $P_{ADH2}$ - <i>tHMGR</i> - $T_{RPL2A}$ , Kan <sup>R</sup>                                            | This study |
| BB3-aK-AF-<br>crtIEYBtBLH   | $P_{GPM1}$ - <i>crtI</i> - $T_{ScCYC1}$ , $P_{PDC1}$ - <i>crtE</i> - $T_{RPP1B}$ , $P_{MDH3}$ -<br><i>crtYB</i> - $T_{RPS2}$ , $P_{ADH2}$ - <i>tHMGR</i> - $T_{RPL2A}$ , $P_{GAP}$ - <i>blh</i> -<br>$T_{RPS25A}$ , Kan <sup>R</sup> | This study |
| BB3-aK-AF-<br>crtIEYBtBCO1  | $P_{GPM1}$ - <i>crtI</i> - $T_{ScCYC1}$ , $P_{PDC1}$ - <i>crtE</i> - $T_{RPP1B}$ , $P_{MDH3}$ -<br><i>crtYB</i> - $T_{RPS2}$ , $P_{ADH2}$ - <i>tHMGR</i> - $T_{RPL2A}$ , $P_{GAP}$ -BCO1-<br>$T_{RPS25A}$ , Kan <sup>R</sup>         | This study |
| BB2-AB-BLH                  | $P_{GAP}$ - <i>blh</i> - $T_{RPS25A}$ , Amp <sup>R</sup>                                                                                                                                                                             | This study |
| BB2-BC-GND2                 | $P_{GPM1}$ - <i>GND2</i> - $T_{RPP1B}$ , Amp <sup>R</sup>                                                                                                                                                                            | This study |
| BB2-CD-POS5                 | $P_{ADH2}$ - <i>POS5</i> - $T_{RPS2}$ , Amp <sup>R</sup>                                                                                                                                                                             | This study |
| BB2-DE-ZWF1                 | $P_{TEF1}$ - <i>ZWF1</i> - $T_{RPL2A}$ , Amp <sup>R</sup>                                                                                                                                                                            | This study |
| BB3-Z4-intE12-<br>BLH-GND2- | $P_{GAP}$ - <i>blh</i> - $T_{RPS25A}$ , $P_{GPM1}$ - <i>GND2</i> - $T_{RPP1B}$ , $P_{ADH2}$ -<br><i>POS5</i> - $T_{RPS2}$ , $P_{TEF1}$ - <i>ZWF1</i> - $T_{RPL2A}$ , Bleo <sup>R</sup>                                               | This study |

---

---

|                                                   |                                                                                                                                                               |            |
|---------------------------------------------------|---------------------------------------------------------------------------------------------------------------------------------------------------------------|------------|
| POS5-ZWF1                                         |                                                                                                                                                               |            |
| BB3-Z5-intE12-<br>BLH-GND2-<br>POS5-ZWF1-<br>DGA1 | $P_{GAP-blh-T_{RPS25A}}$ , $P_{GPM1-GND2-T_{RPP1B}}$ , $P_{ADH2-POS5-T_{RPS2}}$ , $P_{TEF1-ZWF1-T_{RPL2A}}$ , $P_{RPP1B-DGA1-T_{RPS25A}}$ , Bleo <sup>R</sup> | This study |
| BB1-23-ACL                                        | ACL, Kan <sup>R</sup>                                                                                                                                         | This study |
| BB1-23-ACS                                        | ACS, Kan <sup>R</sup>                                                                                                                                         | This study |
| BB1-23-PTA                                        | PTA, Kan <sup>R</sup>                                                                                                                                         | This study |
| BB1-23-PK                                         | PK, Kan <sup>R</sup>                                                                                                                                          | This study |
| BB2-AB-ACL                                        | $P_{GAP-ACL-T_{RPS25A}}$ , Amp <sup>R</sup>                                                                                                                   | This study |
| BB2-BC-ACS                                        | $P_{MDH3-ACS-T_{RPS2}}$ , Amp <sup>R</sup>                                                                                                                    | This study |
| BB2-AB-PTA                                        | $P_{MDH3-PTA-T_{RPS2}}$ , Amp <sup>R</sup>                                                                                                                    | This study |
| BB2-BC-PK                                         | $P_{GAP-PK-T_{RPS25A}}$ , Amp <sup>R</sup>                                                                                                                    | This study |
| BB3rN-AC-ACL-<br>ACS                              | $P_{GAP-ACL-T_{RPS25A}}$ , $P_{MDH3-ACS-T_{RPS2}}$ , Nat                                                                                                      | This study |
| BB3rN-AC-PTA-<br>PK                               | $P_{MDH3-PTA-T_{RPS2}}$ , $P_{GAP-PK-T_{RPS25A}}$ , Nat                                                                                                       | This study |
| BB1-23-CK                                         | CK, Kan <sup>R</sup>                                                                                                                                          | This study |
| BB1-23-IPK                                        | IPK, Kan <sup>R</sup>                                                                                                                                         | This study |
| BB2-CD-IPK                                        | $P_{ADH2-IPK-T_{RPS2}}$ , Amp <sup>R</sup>                                                                                                                    | This study |
| BB2-DE-CK                                         | $P_{GPM1-CK-T_{RPL2A}}$ , Amp <sup>R</sup>                                                                                                                    | This study |
| BB3rN-AE-ACL-                                     | $P_{GAP-ACL-T_{RPS25A}}$ , $P_{MDH3-ACS-T_{RPS2}}$ , $P_{ADH2-}$                                                                                              | This study |

---

---

|                |                                                                                                               |            |
|----------------|---------------------------------------------------------------------------------------------------------------|------------|
| ACS-IPK-CK     | IPK-T <sub>RPS2</sub> , P <sub>GPM1</sub> -CK-T <sub>RPL2A</sub> , Nat                                        |            |
| BB3rN-AE-PTA-  | P <sub>MDH3</sub> -PTA-T <sub>RPS2</sub> , P <sub>GAP</sub> -PK-T <sub>RPS25A</sub> , P <sub>ADH2</sub> -IPK- | This study |
| PK-IPK-CK      | T <sub>RPS2</sub> , P <sub>GPM1</sub> -CK-T <sub>RPL2A</sub> , Nat                                            |            |
| BB3eH-AC-EGFP- | P <sub>GAP</sub> -EGFP-PEX15-T <sub>ScCYC1</sub> , P <sub>GCW14</sub> -mCherry-                               | This study |
| PEX15-mCherry- | ePTS1-T <sub>RPL2A</sub>                                                                                      |            |
| ePTS1          |                                                                                                               |            |
| BB3rN-AF-PTA-  | P <sub>MDH3</sub> -PTA-T <sub>RPS2</sub> , P <sub>GAP</sub> -PK-T <sub>RPS25A</sub> , P <sub>ADH2</sub> -IPK- | This study |
| PK-IPK-CK-blh- | T <sub>RPS2</sub> , P <sub>GPM1</sub> -CK-T <sub>RPL2A</sub> , P <sub>GAP</sub> -blh-PEX15-                   |            |
| PEX15          | T <sub>ScCYC1</sub> , Nat                                                                                     |            |
| BB1-23-VHb     | VHb, Kan <sup>R</sup>                                                                                         | This study |
| BB1-23-Yor1    | Yor1, Kan <sup>R</sup>                                                                                        | This study |
| BB1-23-Snq2    | Snq2, Kan <sup>R</sup>                                                                                        | This study |
| BB1-23-Pdr5    | Pdr5, Kan <sup>R</sup>                                                                                        | This study |
| BB1-23-Pdr10   | Pdr10, Kan <sup>R</sup>                                                                                       | This study |
| BB1-23-Pdr12   | Pdr12, Kan <sup>R</sup>                                                                                       | This study |
| BB1-23-Pdr15   | Pdr15, Kan <sup>R</sup>                                                                                       | This study |
| BB3eH-14       | Integrative vector with the Hygromycin B marker                                                               | Purchase   |
| BB3eH-14-VHb   | P <sub>GCW14</sub> -VHb-T <sub>RPP17B</sub> , Hygromycin B                                                    | This study |
| BB3eH-14-Yor1  | P <sub>GAP</sub> -Yor1-T <sub>ScCYC1</sub> , Hygromycin B                                                     | This study |
| BB3eH-14-Snq2  | P <sub>GAP</sub> -Snq2-T <sub>ScCYC1</sub> , Hygromycin B                                                     | This study |
| BB3eH-14-Pdr5  | P <sub>GAP</sub> -Pdr5-T <sub>ScCYC1</sub> , Hygromycin B                                                     | This study |
| BB3eH-14-Pdr10 | P <sub>GAP</sub> -Pdr10-T <sub>ScCYC1</sub> , Hygromycin B                                                    | This study |

---

---

|                |                                                                  |            |
|----------------|------------------------------------------------------------------|------------|
| BB3eH-14-Pdr12 | $P_{GAP}$ -Pdr12- $T_{ScCYC1}$ , Hygromycin B                    | This study |
| BB3eH-14-Pdr15 | $P_{GAP}$ -Pdr15- $T_{ScCYC1}$ , Hygromycin B                    | This study |
| BB2-AB-Pdr5    | $P_{GAP}$ -Pdr5- $T_{ScCYC1}$ , Amp <sup>R</sup>                 | This study |
| BB2-BC-VHb     | $P_{GCW14}$ -VHb- $T_{RPP17B}$ , Amp <sup>R</sup>                | This study |
| BB3eH-AC-Pdr5- | $P_{GAP}$ -Pdr5- $T_{ScCYC1}$ , $P_{GCW14}$ -VHb- $T_{RPP17B}$ , | This study |
| VHb            | Hygromycin B                                                     |            |

---

**Table S3.** Comparison of fermentation substrates and yields between the strains constructed in this study and previous studies.

| Strains              | Substrate              | Yields               | References |
|----------------------|------------------------|----------------------|------------|
| <i>E. coli</i>       | Glycerol and arabinose | 109 mg/L retinoid    | 1          |
| <i>E. coli</i>       | Glycerol               | 136 mg/L retinoid    | 2          |
| <i>S. cerevisiae</i> | Glucose and xylose     | 97.09 mg/L retinol   | 3          |
| <i>S. cerevisiae</i> | Glucose and ethanol    | 2479.34 mg/L retinol | 4          |
| <i>Y. lipolytica</i> | Glucose                | 4.86 g/L retinol     | 5          |
| <i>Y. lipolytica</i> | Glucose                | 8.92 g/L retinol     | 6          |
| <i>E. coli</i>       | Glucose                | 245.73 mg/L retinal  | 7          |
| <i>S. cerevisiae</i> | Glucose                | 69.13 mg/L retinal   | 8          |
| <i>S. cerevisiae</i> | Glucose                | 638.12 mg/L retinal  | 9          |
| <i>K. phaffii</i>    | Glucose                | 764.22 mg/L retinal  | This study |
| <i>K. phaffii</i>    | Methanol               | 1406.69 mg/L retinal | This study |

## References:

1. H. J. Jang, B. K. Ha, J. Zhou, J. Ahn, S. H. Yoon and S. W. Kim, *Biotechnol. Bioeng.*, 2015, **112**, 1604-1612.
2. H. J. Jang, S. H. Yoon, H. K. Ryu, J. H. Kim, C. L. Wang, J. Y. Kim, D. K. Oh and S. W. Kim, *Microb. Cell Fact.*, 2011, **10**, 59.
3. Y. G. Lee, C. Kim, L. Sun, T. H. Lee and Y. S. Jin, *Biotechnol. Bioeng.*, 2022, **119**, 399-410.
4. Q. Hu, T. Zhang, H. Yu and L. Ye, *Bioresour. Bioprocess.*, 2022, **9**, 22.
5. H. Park, D. Lee, J. E. Kim, S. Park, J. H. Park, C. W. Ha, M. Baek, S. H. Yoon, K. H. Park, P. Lee and J. S. Hahn, *Metab. Eng.*, 2022, **73**, 26-37.
6. J. Li, X. Li, K. Linghu, N. Yang, Z. Shao, J. Zhou, H. Hou and W. Zeng, *Bioresource Technol.*, 2026, **445**, 134041.
7. C. L. Liu, G. Xu, E. Fordjour, L. Zhao, Y. Yang, X. Liu and Z. Bai, *Bioresource Technol.*, 2026, **440**, 133501.
8. Q. Mo, W. Song, Z. Xue and J. Yuan, *Green Chemistry*, 2022, **24**, 8259-8263.
9. Y. Zhang, Q. Hu, H. Yu and L. Ye, *BioDesign Research*, 2025, **7**, 100023.
